# Supplementary material for: Tafazzin-Deficient Zebrafish Display Mitochondrial Dysfunction, Neutropenia, and Metabolic Defects Without Myopathy
Source: Research Square preprint supplement (doi:10.21203/rs.3.rs-5960642/v1), 2025-04-24
Supplement: Supplementary file 1 [file 512749ebd71fa312333e08ee.docx]

**Tafazzin-Deficient Zebrafish Display Mitochondrial Dysfunction, Neutropenia, and Metabolic Defects Without Myopathy**

Usua Oyarbide, Rebecca A. Anderson, Igor Radzikh, Jillian V. Kodger, Akshay S. Patil, Morgan Staton, Anny Mulya, Genevieve M. Crane, Silvio Litovsky, Yana Sandlers, Seth J. Corey

**Supplemental Table 1 . CRISPR/Cas9 Mutations**

| **Allele** | **CRISPR target sequence (5' - 3'** | **RE site lost** | **Mutation** |
| --- | --- | --- | --- |
| *taz* | TAAGTTCCGGCAGTTGTGGA | SmlI | 1 bp del |

RE, Restriction Enzyme

**Supplemental Table 2. Genotyping Primers**

| ***Allele*** | **F Primer (5' - 3')** | **R Primer (5' - 3')** |
| --- | --- | --- |
| *taz* | AACACAATTGAGGCCACAGG | TCACCATCTCATCTTGTTAAGGT |

**Supplemental Table 3. RT-qPCR Primers**

| **Gene** | **F Primer (5' - 3')** | **R Primer (5' - 3')** |
| --- | --- | --- |
| *taz* | GGACACACCCCTTATCACAGT | TCCACAACTGCCGGAACTTA |
| *lclat1* | GATTTGCTGCGGGACTCAGA | ATGTTGCTCATGTGTGTGCG |
| *pck1* | TCACGCATCGCTAAAGAGGA | GCCGCTGCGAAATACTTCTT |
| *pyrk?* | CCATATCACCTGAGCGGAAGA | CGAGTCCTCATACAAGTGCTG |
| *mpx* | CAATGGCCCGCATAATCTG | GCGAAAAGGATCTCTGGGAACT |
| *β-actin* | TGCTGTTTTCCCCTCCATTG | TTCTGTCCCATGCCAACCA |
| *chop* | AAGGAAAGTGCAGGAGCTGA | TCACGCTCTCCACAAGAAGA |
| *atf6* | CTGTGGTGAAACCTCCACCT | CATGGTGACCACAGGAGATG |
| *bip* | AGATCTTCTCCACTGCTTCCGACAA | TCTACAGCTCGTCCTTCTCTTCGGC |
| *xbps-t* | GAGGAGCCCACAAAGTCCTC | CGAAGTGCTTTTTCCTCTGG |
| *xbp-s* | TGTTGCGAGACAAGACGA | CCTGCACCTGCTGCGGACT |
| *atf4b* | GGTGTCTCTGCCCTGGTTAC | TCGTTCTGTCATCCAATCCA |
| *tp53* | CTCTCCCACCAACATCCACT | ACGTCCACCACCATTTGAAC |
| *cdkn1a* | AGAGCTCGCGTGGAGTCAG | CCGAAAAGACTCCGCCTA |
| *bax* | GGAGATGAGCTGGATGGAAA | AGATCTCACGGGCCACTCT |
| *puma* | ACT GCC CCA CAT CCC CTC AC | CGT CCC CGA TTG TCC TCA GTT G |
| *hadhaa* | TACTACCAGGTGTCTTGCGC | AATCCAGCTTCTTCGGGTCA |
| *aco2* | GTTGATGTCATGGCAGGCAT | GACATCCTTTGGTGAGCTCC |

**Supplemental Table 4. List of the 20 most upregulated and downregulated genes from the RNA-seq results.**

| **Gene symbol** | **Gene name** | **log2(foldchange)** | **q value** |
| --- | --- | --- | --- |
| *tulp1a* | TUB like protein 1a | -2.55272 | 0.000468 |
| *ppp1r27b* | protein phosphatase 1, regulatory subunit 27b | -2.12655 | 0.009454 |
| *si:dkey-14d8.6* | si:dkey-14d8.6 | -2.0993 | 0.000468 |
| *sdr42e2* | short chain dehydrogenase/reductase family 42E, member 2 | -2.00283 | 0.000468 |
| *cyp2aa9* | cytochrome P450, family 2, subfamily AA, polypeptide 9 | -1.96624 | 0.000468 |
| *LOC110437793* | PEST proteolytic signal-containing nuclear protein-like | -1.95086 | 0.009683 |
| *si:dkey-219e21.4* | si:dkey-219e21.4(si:dkey-219e21.4) | -1.9096 | 0.00194 |
| *LOC110437984* | uncharacterized LOC110437984 | -1.88503 | 0.027247 |
| *scpp9* | secretory calcium-binding phosphoprotein 9 | -1.88153 | 0.000468 |
| *cyp2aa8* | cytochrome P450, family 2, subfamily AA, polypeptide 8 | -1.83026 | 0.000468 |
| *slc6a1l* | Solute carrier family 6 member 1, like | -1.78398 | 0.00922 |
| *tceanc2* | transcription elongation factor A (SII) N-terminal and central domain containing 2 | -1.783 | 0.020449 |
| *oxt* | Oxytocin | -1.7388 | 0.049253 |
| *stc1l* | stanniocalcin 1, like | -1.69356 | 0.000468 |
| *npvf* | Neuropeptide VF precursor | -1.44847 | 0.004095 |
| *LOC108180718* | syncollin-like | -1.35919 | 0.008503 |
| *endou* | endonuclease, polyU-specific | -1.33194 | 0.000468 |
| *cyp2aa3* | cytochrome P450, family 2, subfamily AA, polypeptide 3 | -1.32055 | 0.042461 |
| *slc16a6a* | solute carrier family 16 member 6a | -1.30226 | 0.000468 |
| *cenpv* | centromere protein V | -1.29401 | 0.017882 |
| *trpv6* | transient receptor potential cation channel, subfamily V, member 6 | 3.48984 | 0.000468 |
| *LOC100004951* | cytolytic toxin-alpha-like | 3.4629 | 0.000468 |
| *mblac1* | metallo-beta-lactamase domain containing 1( | 3.34197 | 0.000468 |
| *mmp9* | matrix metallopeptidase 9 | 2.93841 | 0.000468 |
| *mmp30* | matrix metallopeptidase 30 | 2.88733 | 0.000468 |
| *ifit14* | interferon-induced protein with tetratricopeptide repeats 14 | 2.83961 | 0.041522 |
| *LOC110438318* | uncharacterized LOC110438318 | 2.79529 | 0.000468 |
| *ifit15* | interferon-induced protein with tetratricopeptide repeats 15 | 2.76208 | 0.012006 |
| *LOC103908677* | tubby-related protein 1-like | 2.66524 | 0.000872 |
| *LOC100332535* | uncharacterized LOC100332535 | 2.63346 | 0.000468 |
| *LOC110366352* | ncharacterized LOC110366352 | 2.47028 | 0.047764 |
| *fosl1a* | FOS like 1, AP-1 transcription factor subunit a | 2.41269 | 0.000468 |
| *hspb6* | eat shock protein, alpha-crystallin-related, b6 | 2.32346 | 0.000468 |
| *stat1b* | signal transducer and activator of transcription 1b | 2.30964 | 0.000468 |
| *LOC100151424* | cytolytic toxin-alpha-like | 2.27792 | 0.003212 |
| *arf4b* | ADP-ribosylation factor 4b | 2.27153 | 0.00259 |
| *rsad2* | radical S-adenosyl methionine domain containing 2 | 2.20064 | 0.034116 |
| *LOC108179107* | uncharacterized LOC108179107 | 2.19901 | 0.000468 |
| *atf3* | activating transcription factor 3 | 2.03906 | 0.000468 |
| *gch2* | GTP cyclohydrolase 2 | 2.01313 | 0.000468 |
| *irg1l* | immunoresponsive gene 1, like | 2.00345 | 0.000468 |
